# Supplementary material for: Ruthenium decorated hierarchically ordered macro–mesoporous carbon for lithium oxygen batteries
Source: Royal Society of Chemistry journal article supplement (doi:10.1039/c6ta00317f), 2016-01-01
Supplement: c6ta00317f1.pdf [file c6ta00317f1.pdf]

## Supporting information

### Ruthenium Decorated Hierarchically Ordered Macro- mesoporous Carbon for Lithium Oxygen batteries

Xin Guo, Bing Sun, Jinqiang Zhang, Hao Liu\* and Guoxiu Wang\*

Centre for Clean Energy Technology, University of Technology Sydney, Broadway, Sydney

NSW 2007, Australia. \*Email: [hao.liu@uts.edu.au](mailto:hao.liu@uts.edu.au); [Guoxiu.Wang@uts.edu.au](mailto:Guoxiu.Wang@uts.edu.au)

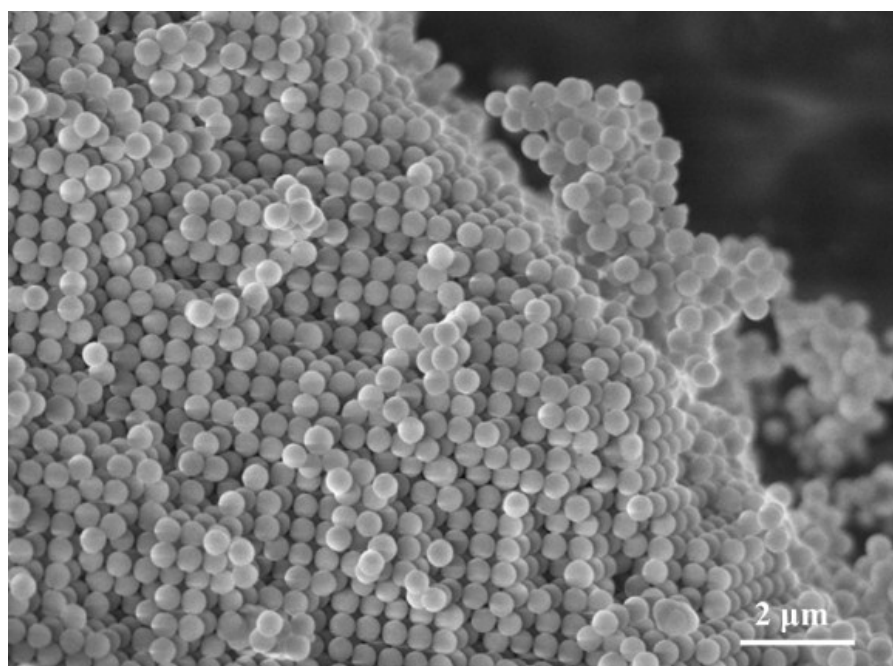

Fig. S1 SEM image of SiO<sub>2</sub> templates.

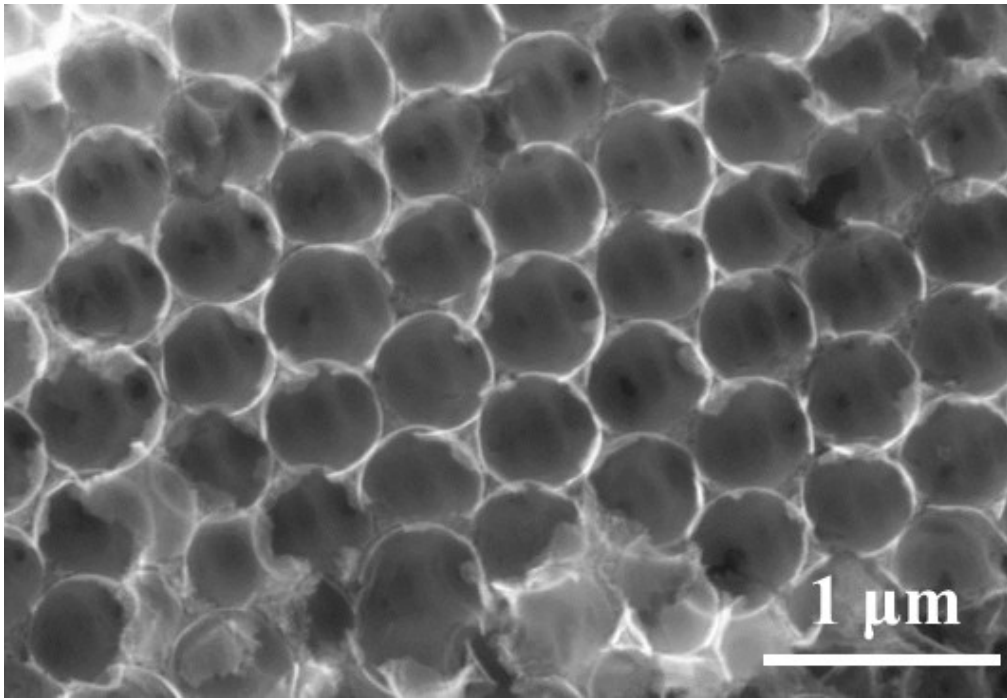

Fig. S2 SEM image of MmC@Ru.

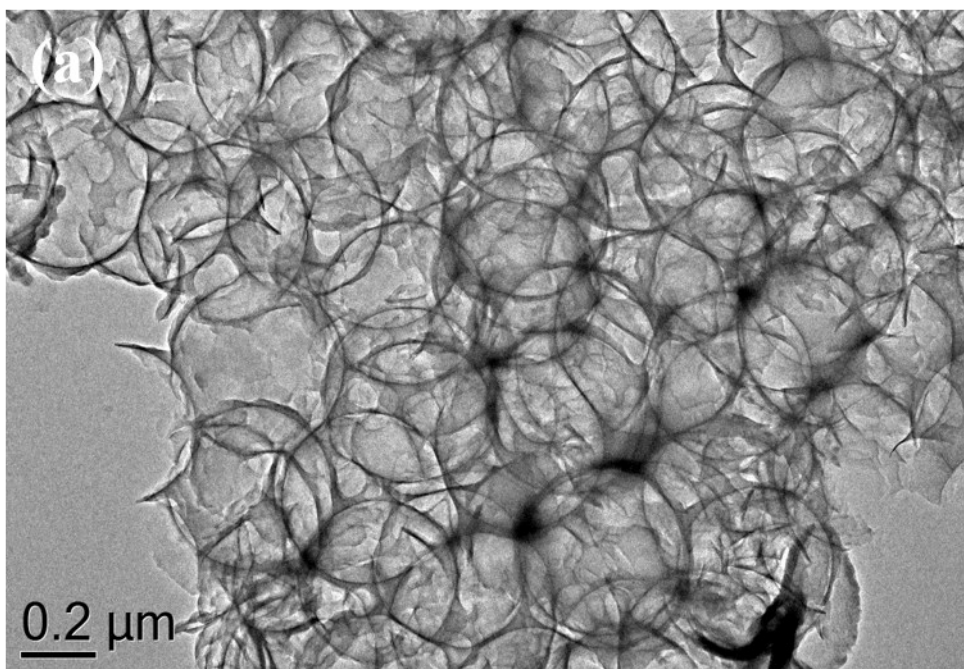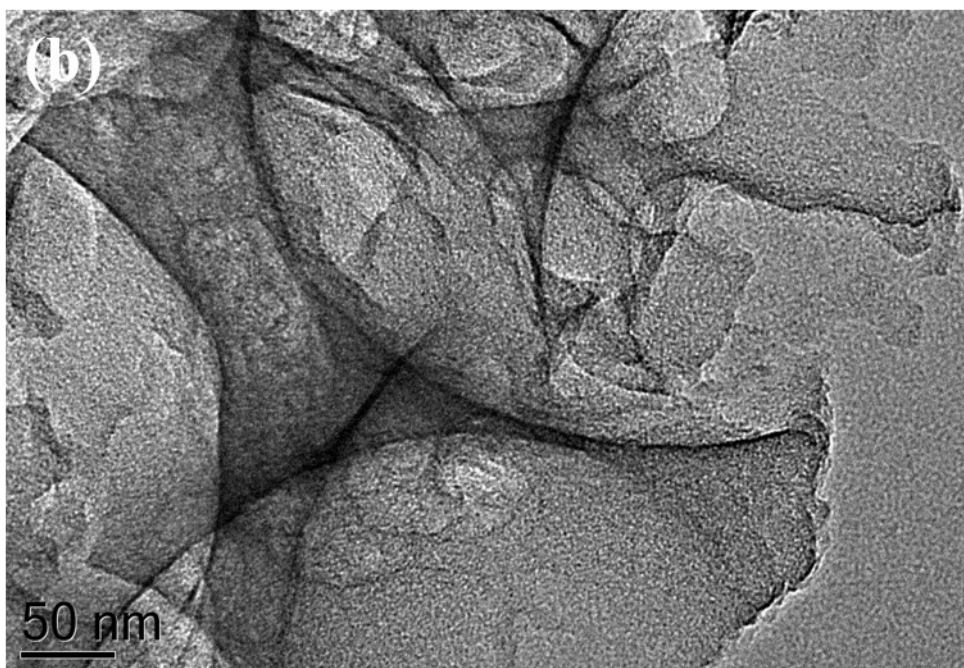

Fig. S3 (a) Low magnification TEM and (b) HRTEM images of MC.

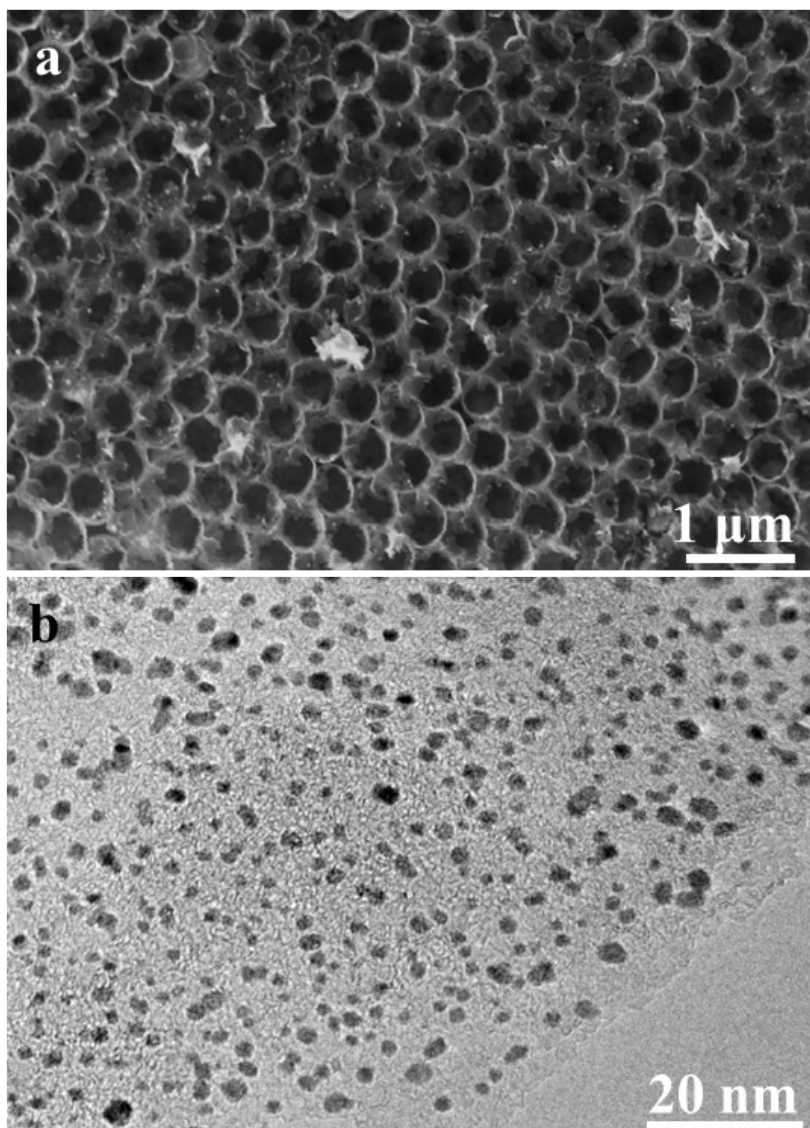

Fig. S4 (a) SEM image and (b) medium magnification TEM image of MC@Ru composite.

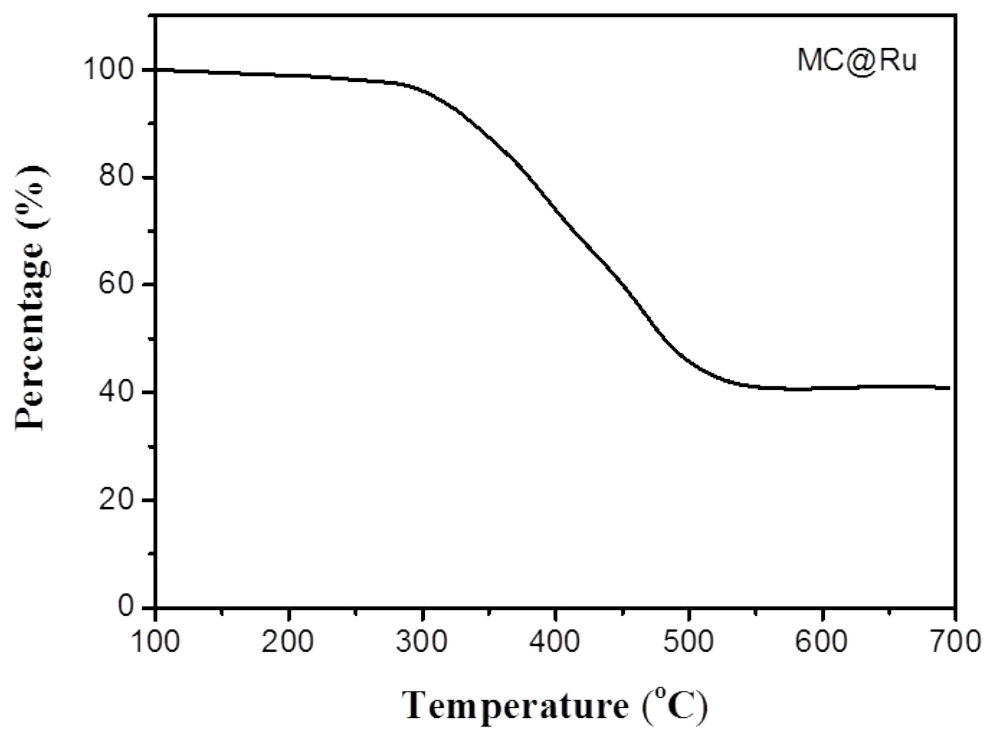

Fig. S5 TG curve of MC@Ru

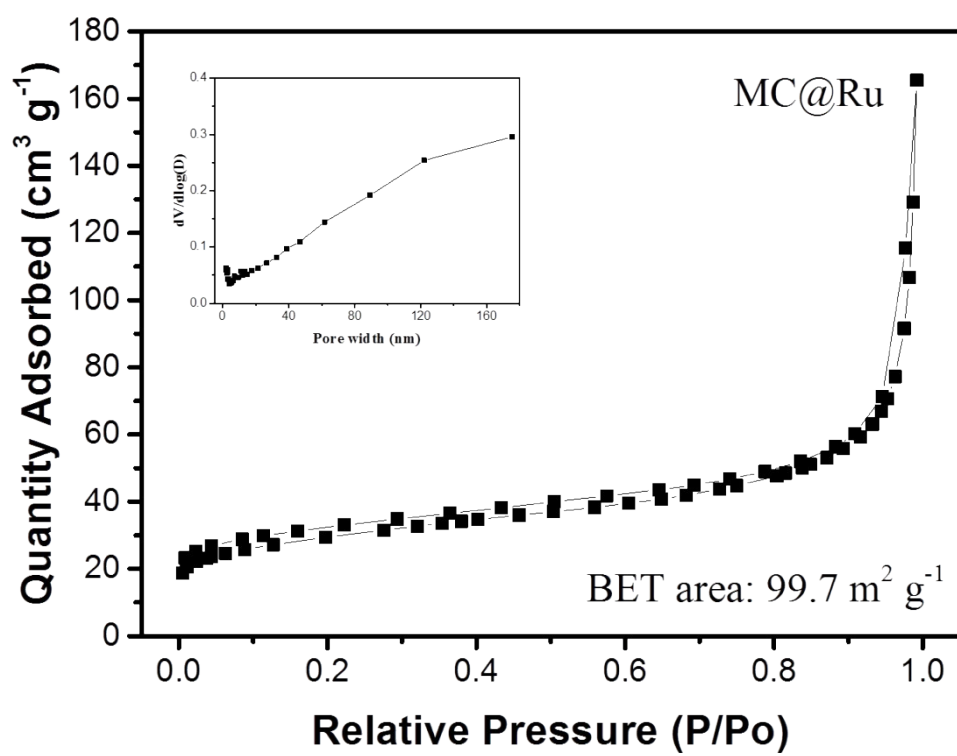

Fig. S6 Nitrogen adsorption/desorption isotherms of the MC@Ru.

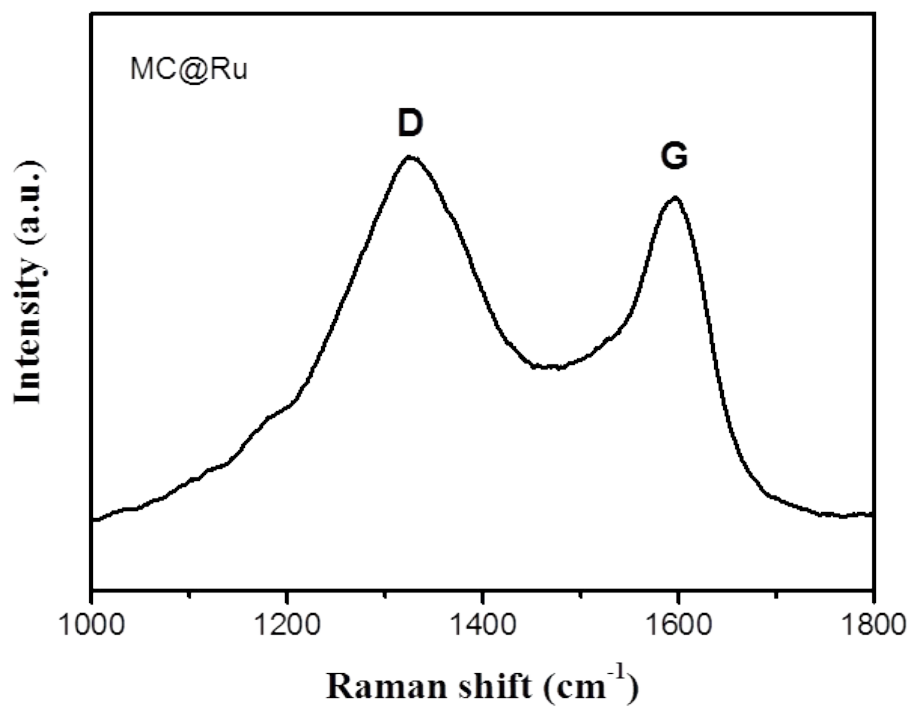

Fig. S7 Raman spectrum of MC@Ru in the range of 1000-1800 cm<sup>-1</sup>.

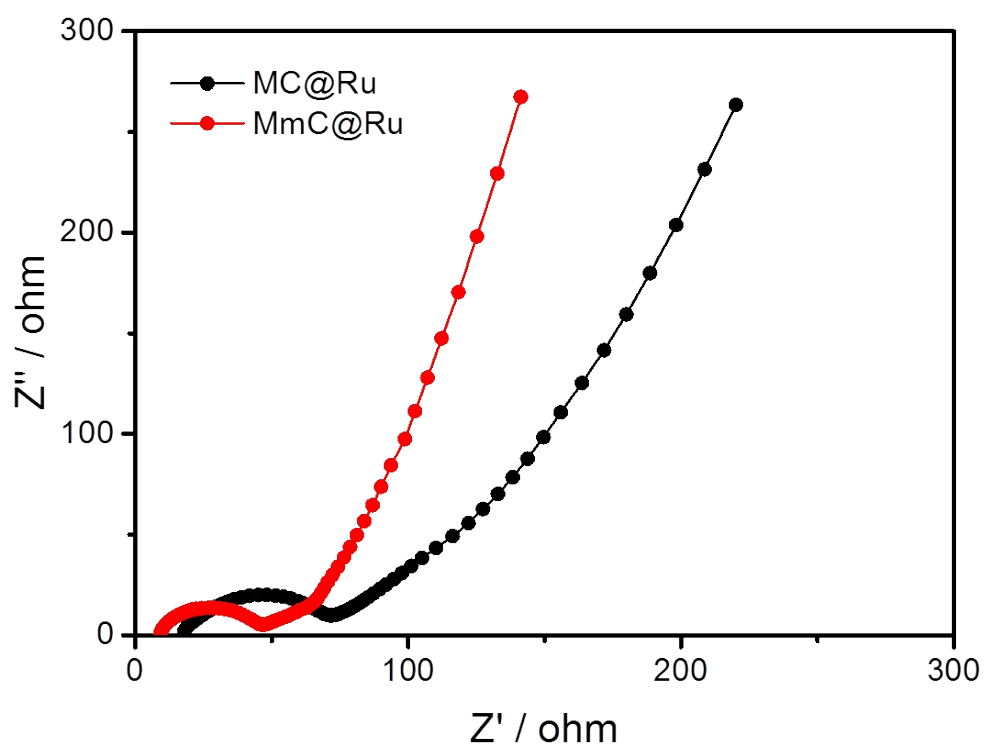

Fig. S8 Impedance spectra (Nyquist plots) of MC@Ru and MmC@Ru electrodes. The fresh electrodes were assembled into batteries and placed in oxygen atmosphere for 4h before the test.



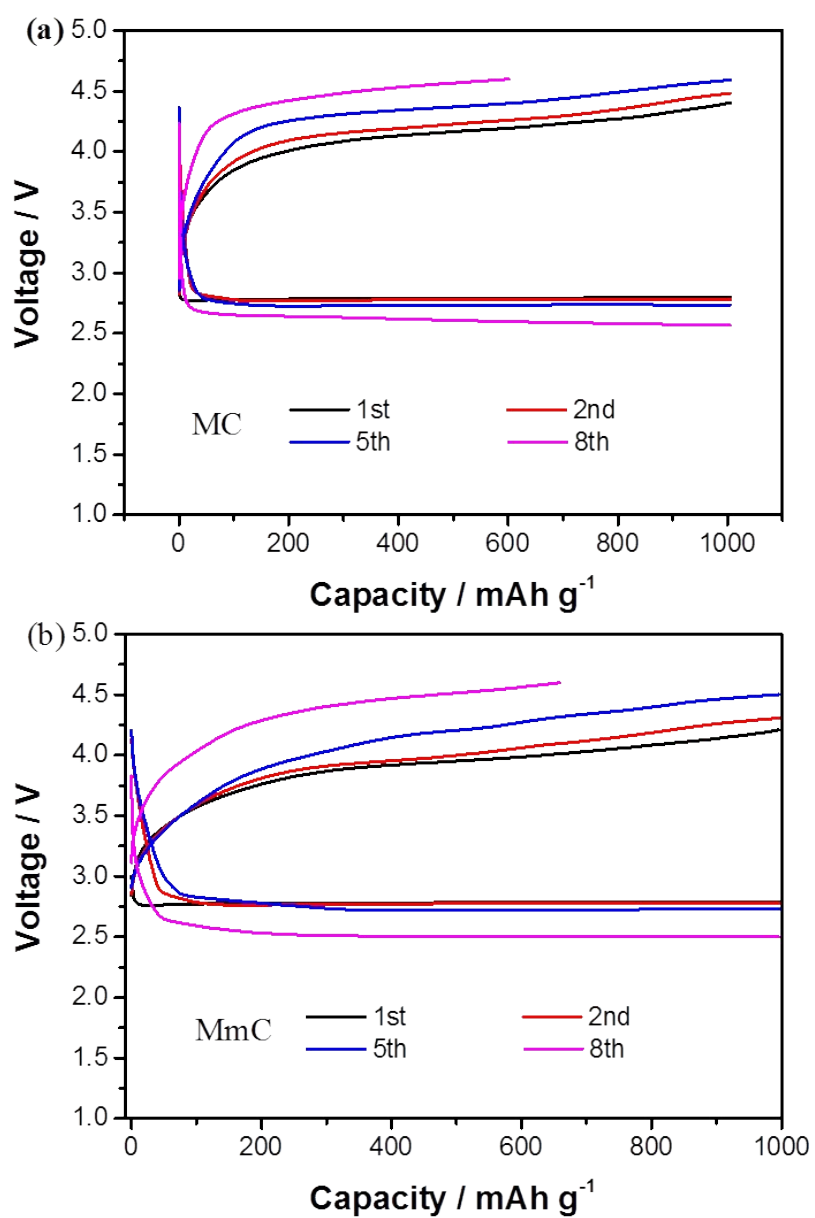

Fig. S8 Discharge/Charge profiles at different cycles of Li-O<sub>2</sub> batterie. (a) MC and (b) MmC cathode at a current density of 400 mA g<sup>-1</sup> with a curtailing capacity of 1000 mAh g<sup>-1</sup>.

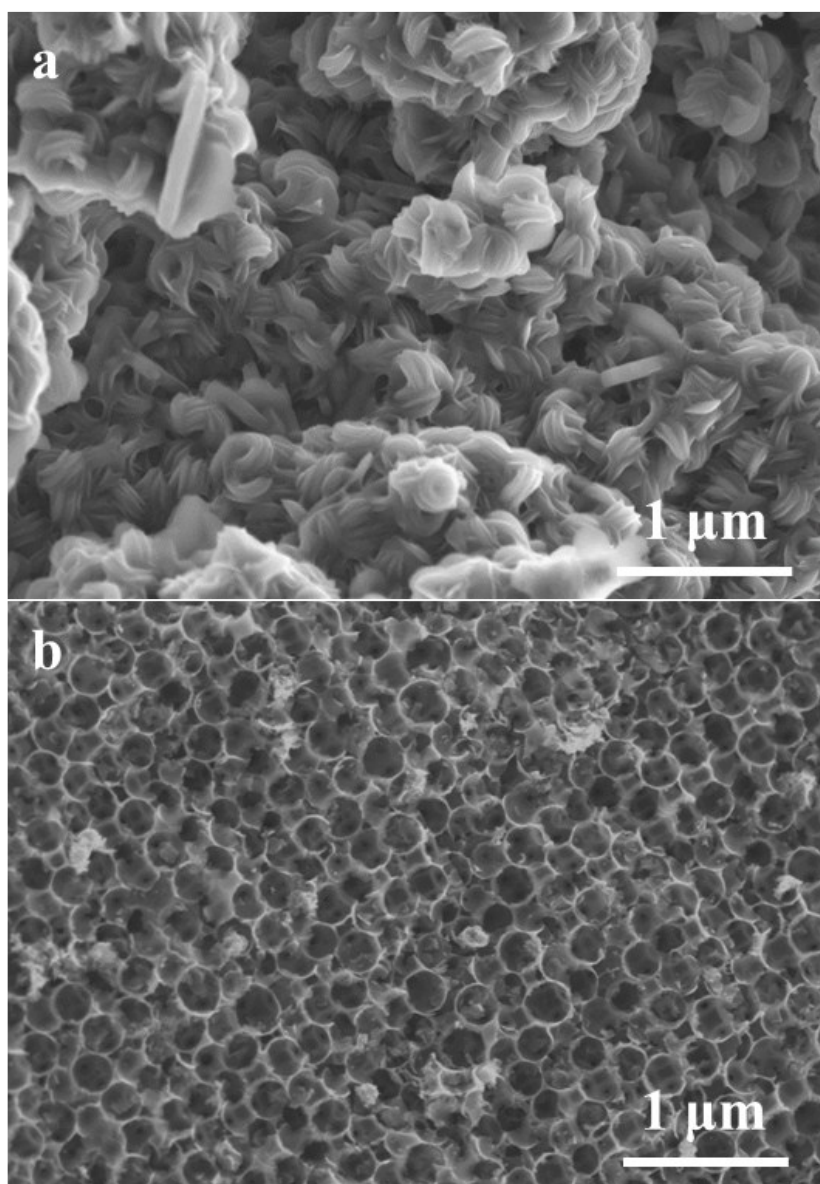

Fig. S9 SEM images of MC@Ru electrode after fully (a) discharge and (b) charge at 400mA g<sup>-1</sup>.

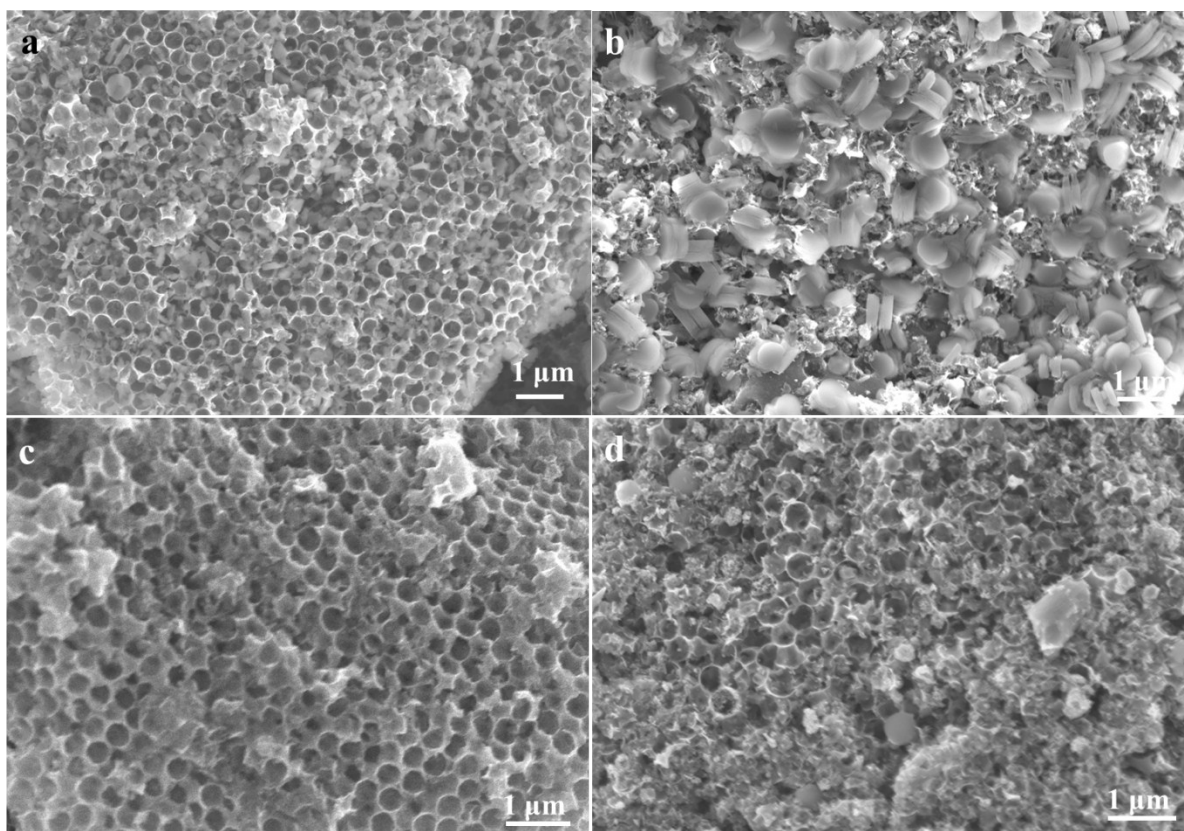

Fig. S10 (a) SEM images of discharged MmC@Ru electrode and (b) MC@Ru electrode by curtailing the capacity to 2000 mAh g<sup>-1</sup>; (c) SEM images of MmC@Ru electrode and (d) MC@Ru electrode after 10 cycles at a current density of 400 mA g<sup>-1</sup> with a restricted capacity to 2000 mAh g<sup>-1</sup>.
